# Supplementary material
Source: publisher figshare collection journal article supplement (https://acs.figshare.com/ndownloader/files/6010326)
Supplement: Supplementary file 1 [file 6010326]

Compound_ID	SMILES	agonist activities EC50 nM (95% CI), human	agonist activities EC50 nM (95% CI), rat
1	O=C(N)[C@H](CC1=CNC2=C1C=CC=C2)NC([C@H](CCCNC(NC)=N)NC([C@H](CC(C)C)NC(NNC([C@H](CC3=CC=CC=C3)NC([C@H]([C@@H](C)O)NC([C@H](CC(N)=O)NC([C@@H](CC4=CNC5=C4C=CC=C5)NC([C@@H](CC6=CC=C(O)C=C6)NC(C)=O)=O)=O)=O)=O)=O)=O)=O)=O	0.33 (0.25-0.44)	1.3 (1.1-1.6)
2	O=C(N)[C@H](CC1=CNC2=C1C=CC=C2)NC([C@H](CCCNC(NC)=N)NC([C@H](CC(C)C)NC(NNC([C@H](CC3=CC=CC=C3)NC([C@H]([C@@H](C)O)NC([C@H](CC(N)=O)NC([C@@H](C)NC([C@@H](CC4=CC=C(O)C=C4)NC(C)=O)=O)=O)=O)=O)=O)=O)=O)=O	2.7 (0.92-8.1)	16 (7.9-33)
3	O=C(N)[C@H](CC1=CNC2=C1C=CC=C2)NC([C@H](CCCNC(NC)=N)NC([C@H](CC(C)C)NC(NNC([C@H](CC3=CC=CC=C3)NC([C@H]([C@@H](C)O)NC([C@H](CC(N)=O)NC([C@@H](CC(C)C)NC([C@@H](CC4=CC=C(O)C=C4)NC(C)=O)=O)=O)=O)=O)=O)=O)=O)=O	2.0 (0.71-5.9)	12 (5.7-26)
4	O=C(N)[C@H](CC1=CNC2=C1C=CC=C2)NC([C@H](CCCNC(NC)=N)NC([C@H](CC(C)C)NC(NNC([C@H](CC3=CC=CC=C3)NC([C@H]([C@@H](C)O)NC([C@H](CC(N)=O)NC([C@@H](CCCCN)NC([C@@H](CC4=CC=C(O)C=C4)NC(C)=O)=O)=O)=O)=O)=O)=O)=O)=O	3.6 (1.1-11)	18 (6.5-50)
5	O=C(N)[C@H](CC1=CNC2=C1C=CC=C2)NC([C@H](CCCNC(NC)=N)NC([C@H](CC(C)C)NC(NNC([C@H](CC3=CC=CC=C3)NC([C@H]([C@@H](C)O)NC([C@H](CC(N)=O)NC([C@@H](CCC(O)=O)NC([C@@H](CC4=CC=C(O)C=C4)NC(C)=O)=O)=O)=O)=O)=O)=O)=O)=O	22 (9.7-52)	40 (21-79)
6	O=C(N)[C@H](CC1=CNC2=C1C=CC=C2)NC([C@H](CCCNC(NC)=N)NC([C@H](CC(C)C)NC(NNC([C@H](CC3=CC=CC=C3)NC([C@H]([C@@H](C)O)NC([C@H](CC(N)=O)NC([C@H](CC4=CNC5=C4C=CC=C5)NC([C@@H](CC6=CC=C(O)C=C6)NC(C)=O)=O)=O)=O)=O)=O)=O)=O)=O	0.61 (0.25-1.5)	4.8 (2.5-9.3)
7	O=C(N)[C@H](CC1=CNC2=C1C=CC=C2)NC([C@H](CCCNC(NC)=N)NC([C@H](CC(C)C)NC(NNC([C@H](CC3=CC=CC=C3)NC([C@H]([C@@H](C)O)NC([C@H](CC(N)=O)NC([C@H](CCCCN)NC([C@@H](CC4=CC=C(O)C=C4)NC(C)=O)=O)=O)=O)=O)=O)=O)=O)=O	1.6 (1.1-2.3)	6.8 (3.3-14)
8	O=C(N)[C@H](CC1=CNC2=C1C=CC=C2)NC([C@H](CCCNC(NC)=N)NC([C@H](CC(C)C)NC(NNC([C@H](CC3=CC=CC=C3)NC([C@H]([C@@H](C)O)NC([C@H](CC(N)=O)NC([C@H](CCC(O)=O)NC([C@@H](CC4=CC=C(O)C=C4)NC(C)=O)=O)=O)=O)=O)=O)=O)=O)=O	2.8 (2.1-3.6)	11 (5.9-21)
9	O=C(N)[C@H](CC1=CNC2=C1C=CC=C2)NC([C@H](CCCNC(NC)=N)NC([C@H](CC(C)C)NC(NNC([C@H](CC3=CC=CC=C3)NC([C@H]([C@@H](C)O)NC([C@H](CC(N)=O)NC(CNC([C@@H](CC4=CC=C(O)C=C4)NC(C)=O)=O)=O)=O)=O)=O)=O)=O)=O	5.2 (2.3-12)	46 (10-200)
10	O=C(N)[C@H](CC1=CNC2=C1C=CC=C2)NC([C@H](CCCNC(NC)=N)NC([C@H](CC(C)C)NC(NNC([C@H](CC3=CC=CC=C3)NC([C@H]([C@@H](C)O)NC([C@H](CC(N)=O)NC([C@H](C)NC([C@@H](CC4=CC=C(O)C=C4)NC(C)=O)=O)=O)=O)=O)=O)=O)=O)=O	1.2 (0.76-2.0)	6.0 (3.2-11)
11	O=C(N)[C@H](CC1=CNC2=C1C=CC=C2)NC([C@H](CCCNC(NC)=N)NC([C@H](CC(C)C)NC(NNC([C@H](CC3=CC=CC=C3)NC([C@H]([C@@H](C)O)NC([C@H](CC(N)=O)NC(C(C)(C)NC([C@@H](CC4=CC=C(O)C=C4)NC(C)=O)=O)=O)=O)=O)=O)=O)=O)=O	2.4 (1.6-3.6)	17 (6.4-47)
12	O=C(N)[C@H](CC1=CNC2=C1C=CC=C2)NC([C@H](CCCNC(NC)=N)NC([C@H](CC(C)C)NC(NNC([C@H](CC3=CC=CC=C3)NC([C@H]([C@@H](C)O)NC([C@H](CC(N)=O)NC([C@H](C)N(C)C([C@@H](CC4=CC=C(O)C=C4)NC(C)=O)=O)=O)=O)=O)=O)=O)=O)=O	4.4 (1.5-13)	43 (15-130)
13	O=C(N)[C@H](CC1=CNC2=C1C=CC=C2)NC([C@H](CCCNC(NC)=N)NC([C@H](CC(C)C)NC(NNC([C@H](CC3=CC=CC=C3)NC([C@H]([C@@H](C)O)NC([C@H](CC(N)=O)NC([C@@H](C)N(C)C([C@@H](CC4=CC=C(O)C=C4)NC(C)=O)=O)=O)=O)=O)=O)=O)=O)=O	1.8 (1.4-2.4)	7.3 (5.9-9.0)
14	O=C(N)[C@H](CC1=CNC2=C1C=CC=C2)NC([C@H](CCCNC(NC)=N)NC([C@H](CC(C)C)NC(NNC([C@H](CC3=CC=CC=C3)NC([C@H]([C@@H](C)O)NC([C@H](CC(N)=O)NC(CN(C)C([C@@H](CC4=CC=C(O)C=C4)NC(C)=O)=O)=O)=O)=O)=O)=O)=O)=O	4.9 (3.0-8.1)	20 (15-30)
15	O=C(N)[C@H](CC1=CNC2=C1C=CC=C2)NC([C@H](CCCNC(NC)=N)NC([C@H](CC(C)C)NC(NNC([C@H](CC3=CC=CC=C3)NC([C@H]([C@@H](C)O)NC([C@H](CC(N)=O)NC(CCNC([C@@H](CC4=CC=C(O)C=C4)NC(C)=O)=O)=O)=O)=O)=O)=O)=O)=O	3.3 (2.0-5.4)	11 (6.4-18)
16	O=C(N)[C@H](CC1=CNC2=C1C=CC=C2)NC([C@H](CCCNC(NC)=N)NC([C@H](CC(C)C)NC(NNC([C@H](CC3=CC=CC=C3)NC([C@H]([C@@H](C)O)NC([C@H](CC(N)=O)NC(C4=C(C=CC=C4)NC([C@@H](CC5=CC=C(O)C=C5)NC(C)=O)=O)=O)=O)=O)=O)=O)=O)=O	5.2 (2.5-11)	47 (11-200)
17	O=C(N)[C@H](CC1=CNC2=C1C=CC=C2)NC([C@H](CCCNC(NC)=N)NC([C@H](CC(C)C)NC(NNC([C@H](CC3=CC=CC=C3)NC([C@H]([C@@H](C)O)NC([C@H](CC(N)=O)NC([C@H](CCC4)N4C([C@@H](CC5=CC=C(O)C=C5)NC(C)=O)=O)=O)=O)=O)=O)=O)=O)=O	0.48 (0.20-1.2)	9.3 (7.6-11)
18	O=C(N)[C@H](CC1=CNC2=C1C=CC=C2)NC([C@H](CCCNC(NC)=N)NC([C@H](CC(C)C)NC(NNC([C@H](CC3=CC=CC=C3)NC([C@H]([C@@H](C)O)NC([C@H](CC(N)=O)NC([C@@H](CCC4)N4C([C@@H](CC5=CC=C(O)C=C5)NC(C)=O)=O)=O)=O)=O)=O)=O)=O)=O	5.8 (3.0-11)	110 (96-130)
19	O=C(N)[C@H](CC1=CNC2=C1C=CC=C2)NC([C@H](CCCNC(NC)=N)NC([C@H](CC(C)C)NC(NNC([C@H](CC3=CC=CC=C3)NC([C@H]([C@@H](C)O)NC([C@H](CC(N)=O)NC([C@H](CC4)N4C([C@@H](CC5=CC=C(O)C=C5)NC(C)=O)=O)=O)=O)=O)=O)=O)=O)=O	1.9 (1.1-3.4)	16 (9.7-26)
20	O=C(N)[C@H](CC1=CNC2=C1C=CC=C2)NC([C@H](CCCNC(NC)=N)NC([C@H](CC(C)C)NC(NNC([C@H](CC3=CC=CC=C3)NC([C@H]([C@@H](C)O)NC([C@H](CC(N)=O)NC([C@H](CCCC4)N4C([C@@H](CC5=CC=C(O)C=C5)NC(C)=O)=O)=O)=O)=O)=O)=O)=O)=O	2.8 (1.5-5.3)	17 (11-28)
21	O=C(N)[C@H](CC1=CNC2=C1C=CC=C2)NC([C@H](CCCNC(NC)=N)NC([C@H](CC(C)C)NC(NNC([C@H](CC3=CC=CC=C3)NC([C@H]([C@@H](C)O)NC([C@H](CC(N)=O)NC(C(C4)CN4C([C@@H](CC5=CC=C(O)C=C5)NC(C)=O)=O)=O)=O)=O)=O)=O)=O)=O	2.3 (1.3-4.3)	15 (10-21)
22	O=C(N)[C@H](CC1=CNC2=C1C=CC=C2)NC([C@H](CCCNC(NC)=N)NC([C@H](CC(C)C)NC(NNC([C@H](CC3=CC=CC=C3)NC([C@H]([C@@H](C)O)NC([C@H](CC(N)=O)NC([C@@H]4CN(CCC4)C([C@@H](CC5=CC=C(O)C=C5)NC(C)=O)=O)=O)=O)=O)=O)=O)=O)=O	5.5 (4.3-7.0)	45 (23-85)
23	O=C(N)[C@H](CC1=CNC2=C1C=CC=C2)NC([C@H](CCCNC(NC)=N)NC([C@H](CC(C)C)NC(NNC([C@H](CC3=CC=CC=C3)NC([C@H]([C@@H](C)O)NC([C@H](CC(N)=O)NC([C@H](CC(C=CC=C4)=C4C5)N5C([C@@H](CC6=CC=C(O)C=C6)NC(C)=O)=O)=O)=O)=O)=O)=O)=O)=O	0.49 (0.20-1.2)	7.0 (4.0-12)
24	O=C(N)[C@H](CC1=CNC2=C1C=CC=C2)NC([C@H](CCCNC(NC)=N)NC([C@H](CC(C)C)NC(NNC([C@H](CC3=CC=CC=C3)NC([C@H]([C@@H](C)O)NC([C@H](CC(N)=O)NC([C@H]4N(C([C@@H](CC5=CC=C(O)C=C5)NC(C)=O)=O)C[C@H](O)C4)=O)=O)=O)=O)=O)=O)=O	5.2 (2.3-12)	36 (15-81)
25	O=C(N)[C@H](CC1=CNC2=C1C=CC=C2)NC([C@H](CCCNC(NC)=N)NC([C@H](CC(C)C)NC(NNC([C@H](CC3=CC=CC=C3)NC([C@H]([C@@H](C)O)NC([C@H](CC(N)=O)NC([C@H](CSC4)N4C([C@@H](CC5=CC=C(O)C=C5)NC(C)=O)=O)=O)=O)=O)=O)=O)=O)=O	2.3 (1.3-4.3)	23 (10-54)
26	O=C(N)[C@H](CC1=CNC2=C1C=CC=C2)NC([C@H](CCCNC(NC)=N)NC([C@H](CC(C)C)NC(NNC([C@H](CC3=CC=CC=C3F)NC([C@H]([C@@H](C)O)NC([C@H](CC(N)=O)NC([C@@H](CC4=CNC5=C4C=CC=C5)NC([C@@H](CC6=CC=C(O)C=C6)NC(C)=O)=O)=O)=O)=O)=O)=O)=O)=O	0.65 (0.31-1.4)	1.8 (0.91-3.6)
27	O=C(N)[C@H](CC1=CNC2=C1C=CC=C2)NC([C@H](CCCNC(NC)=N)NC([C@H](CC(C)C)NC(NNC([C@H](CC3=CC=CC(F)=C3)NC([C@H]([C@@H](C)O)NC([C@H](CC(N)=O)NC([C@@H](CC4=CNC5=C4C=CC=C5)NC([C@@H](CC6=CC=C(O)C=C6)NC(C)=O)=O)=O)=O)=O)=O)=O)=O)=O	1.4 (1.1-1.8)	4.8 (3.3-7.1)
28	O=C(N)[C@H](CC1=CNC2=C1C=CC=C2)NC([C@H](CCCNC(NC)=N)NC([C@H](CC(C)C)NC(NNC([C@H](CC3=CC=C(F)C=C3)NC([C@H]([C@@H](C)O)NC([C@H](CC(N)=O)NC([C@@H](CC4=CNC5=C4C=CC=C5)NC([C@@H](CC6=CC=C(O)C=C6)NC(C)=O)=O)=O)=O)=O)=O)=O)=O)=O	1.9 (0.62-6.0)	4.7 (1.8-13)
29	O=C(N)[C@H](CC1=CNC2=C1C=CC=C2)NC([C@H](CCCNC(NC)=N)NC([C@H](CC(C)C)NC(NNC([C@H](CC3=CC=C(Cl)C=C3)NC([C@H]([C@@H](C)O)NC([C@H](CC(N)=O)NC([C@@H](CC4=CNC5=C4C=CC=C5)NC([C@@H](CC6=CC=C(O)C=C6)NC(C)=O)=O)=O)=O)=O)=O)=O)=O)=O	0.56 (0.27-1.1)	2.8 (1.7-4.8)
30	O=C(N)[C@H](CC1=CNC2=C1C=CC=C2)NC([C@H](CCCNC(NC)=N)NC([C@H](CC(C)C)NC(NNC([C@H](CC3=CC(F)=CC=C3)NC([C@H]([C@@H](C)O)NC([C@H](CC(N)=O)NC([C@H](CC4=CNC5=C4C=CC=C5)NC([C@@H](CC6=CC=C(O)C=C6)NC(C)=O)=O)=O)=O)=O)=O)=O)=O)=O	0.073 (0.043-0.12)	1.2 (0.80-1.9)
31	O=C(N)[C@H](CC1=CNC2=C1C=CC=C2)NC([C@H](CCCNC(NC)=N)NC([C@H](CC(C)C)NC(NNC([C@H](CC3=CC=CC(F)=C3)NC([C@H]([C@@H](C)O)NC([C@H](CC(N)=O)NC([C@H](CCCCN)NC([C@@H](CC4=CC=C(O)C=C4)NC(C)=O)=O)=O)=O)=O)=O)=O)=O)=O	0.43 (0.16-1.1)	7.1 (5.8-8.6)
32	O=C(N)[C@H](CC1=CNC2=C1C=CC=C2)NC([C@H](CCCNC(NC)=N)NC([C@H](CC(C)C)NC(NNC([C@H](CC3=CC(F)=CC=C3)NC([C@H]([C@@H](C)O)NC([C@H](CC(N)=O)NC([C@H](CCC(O)=O)NC([C@@H](CC4=CC=C(O)C=C4)NC(C)=O)=O)=O)=O)=O)=O)=O)=O)=O	0.47 (0.27-0.84)	20 (14-28)
33	O=C(N)[C@H](CC1=CNC2=C1C=CC=C2)NC([C@H](CCCNC(NC)=N)NC([C@H](CC(C)C)NC(NNC([C@H](CC3=CC=CC(F)=C3)NC([C@H]([C@@H](C)O)NC([C@H](CC(N)=O)NC(CNC([C@@H](CC4=CC=C(O)C=C4)NC(C)=O)=O)=O)=O)=O)=O)=O)=O)=O	1.1 (0.81-1.6)	7.4 (7.0-8.0)
34	O=C(N)[C@H](CC1=CNC2=C1C=CC=C2)NC([C@H](CCCNC(NC)=N)NC([C@H](CC(C)C)NC(NNC([C@H](CC3=CC=CC(F)=C3)NC([C@H]([C@@H](C)O)NC([C@H](CC(N)=O)NC(C(C)(C)NC([C@@H](CC4=CC=C(O)C=C4)NC(C)=O)=O)=O)=O)=O)=O)=O)=O)=O	1.2 (0.81-1.7)	7.0 (4.7-11)
35	O=C(N)[C@H](CC1=CNC2=C1C=CC=C2)NC([C@H](CCCNC(NC)=N)NC([C@H](CC(C)C)NC(NNC([C@H](CC3=CC=CC(F)=C3)NC([C@H]([C@@H](C)O)NC([C@H](CC(N)=O)NC([C@H]4N(C([C@@H](CC5=CC=C(O)C=C5)NC(C)=O)=O)C[C@H](O)C4)=O)=O)=O)=O)=O)=O)=O	0.75 (0.36-1.6)	8.5 (6.5-11)
